# Supplementary material
Source: PubMed Central journal article supplement (PMC4968764)
Supplement: pnas.1605578113.sapp.pdf [file pnas.1605578113.sapp.pdf]

## Supplemental Figure Legends

**Figure S1.** Selectivity of the FAAH antibody. (A) Representative western blot of FAAH in skin and liver extracts from wild-type and *Faah*<sup>-/-</sup> mice. Glyceraldehyde-3-phosphate dehydrogenase (GAPDH) was used as loading control. (B) Representative single-labeling immunofluorescence for FAAH (green) in skin sections of wild-type and *Faah*<sup>-/-</sup> mice; cell nuclei are stained with DAPI (blue). Scale bar, 20 μm.

**Figure S2.** Double immunofluorescence for FAAH and fatty acid-binding protein-4 (FABP4). Nuclei are stained with DAPI (blue, A and A1); representative immunofluorescence images for FAAH (green, B and B1) and FABP4 (red, C and C1); merged channels images are shown in D and D1. Scale bars, 100 μm in D and 20 μm in D1.

**Figure S3.** Representative western blot of FAAH in epidermis and dermis of wild-type mice. Skin layer separation was performed mechanically, after tissue digestion with dispase. GAPDH was used as loading control.

**Figure S4.** Immunofluorescence for vimentin in mouse skin. Representative images of wounded skin of *Faah*<sup>-/-</sup> mice (A and A1) immunostained (red) for vimentin; cell nuclei are stained with DAPI (blue A and A1). Scale bars, 100 μm in A and 50 μm in A1.

**Figure S5.** Immunofluorescence for cytokeratin 5 (K5), cytokeratin 10 (K10) and filaggrin in mouse skin. Representative images of wounded skin of wild-type (A-C and A1-C1) and *Faah*<sup>-/-</sup> mice (KO, D-F and D1-F1) immunostained (red) for K5 (A, A1 and D, D1), K10 (B, B1 and E, E1) and filaggrin (C, C1 and F, F1); cell nuclei are stained with DAPI (blue A-F and A1-F1). Scale bars, 100 μm in A and 50 μm in A1.

**Figure S6.** Score Plot, positive ion mode, for the Principal Component Analysis on the data set reported in Fig. 4. Wild-type mice (black dots) and *Faah*<sup>-/-</sup> mice (red dots) are differentially clustered, indicating significant differences in their skin lipidome.

**Figure S7.** Tandem MS data (negative ion mode) for (a) NAT(24:0) and (b) NAT(20:0) in skin of *Faah*<sup>-/-</sup> mice, acquired at 40eV collision energy. For each compound the MS/MS spectrum of authentic standard (upper trace) is compared to the MS/MS spectrum of skin-derived compound (lower trace). The *m/z* = 50-200 region is magnified ten folds to improve visibility of diagnostic fragment ions. For NAT(24:0), the MS/MS spectrum stored in the METLIN database (40eV) is also reported (A, inset).

**Figure S8.** Hematoxylin-eosin staining of representative skin sections from wild-type mice treated with vehicle (A and A1) or NAT(20:0) (B and B1). Scale bars, 500  $\mu$ m in A, and B and 50  $\mu$ m in A1 and B1.

**Figure S9.** Effects of OEA on excisional skin wound healing. Time-course (days) of wound healing in mice treated with vehicle (open bars) or various doses (%) of OEA. \**P*<0.05, \*\**P*<0.01 and \*\*\**P*<0.001 compared to vehicle or wild-type mice, two-way ANOVA; n=9.

**Figure S10.** Effects of synthetic (A) NAT(24:0) and (B) NAT(20:0) (each at 0.001-3  $\mu$ M) on intracellular calcium levels in Chinese hamster ovary cells expressing human TRPV1. Data are shown as percentage of response elicited by the reference agonist, capsaicin (1  $\mu$ M).

Supplemental Figure 1

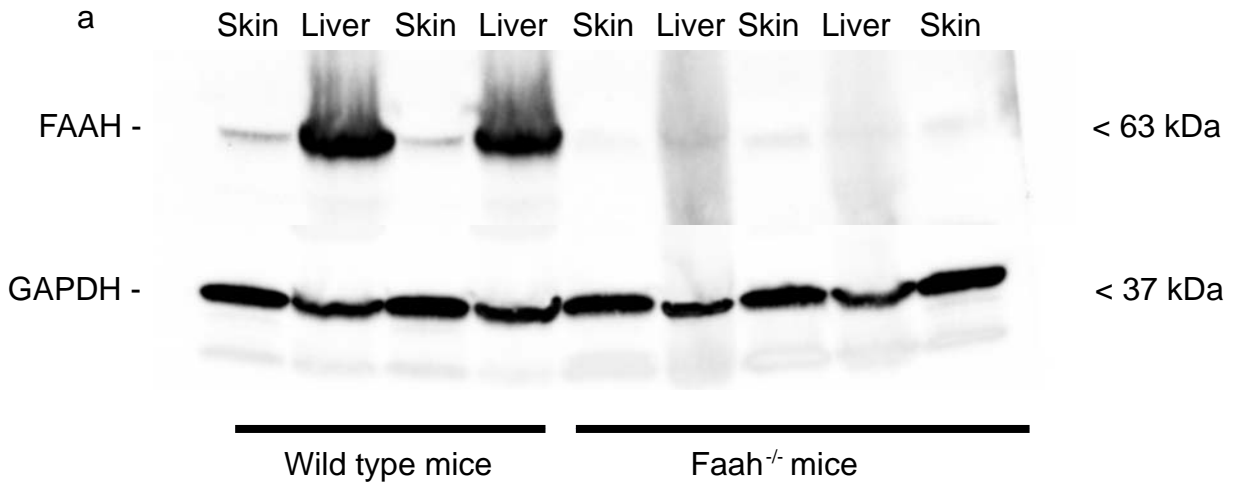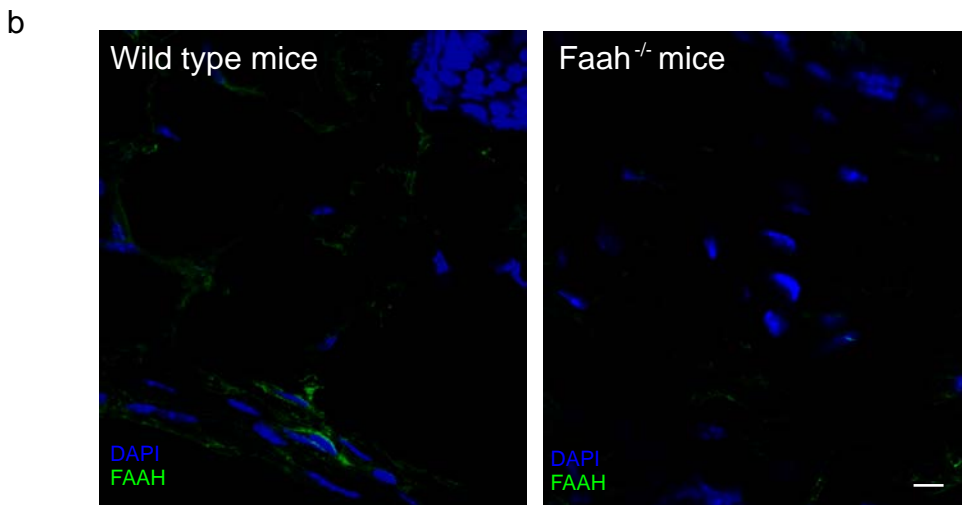

Supplemental Figure 2

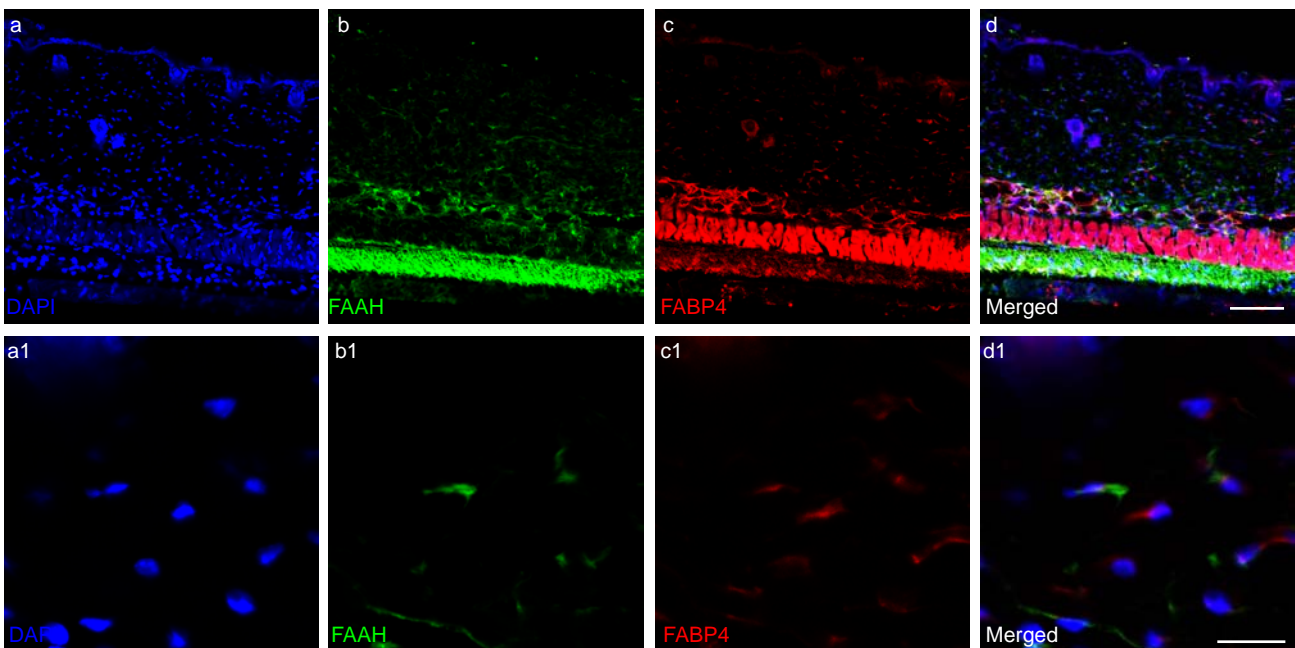

Supplemental Figure 3

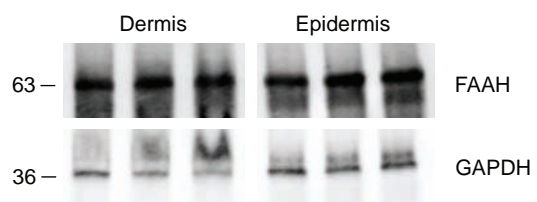

Supplemental Figure 4

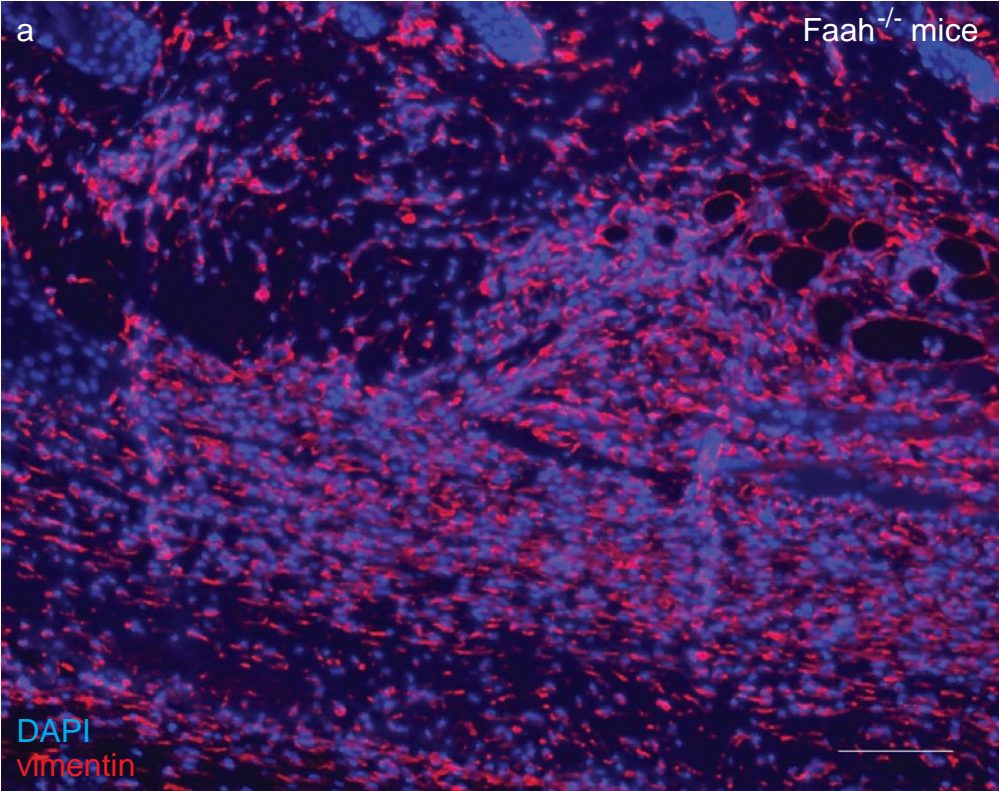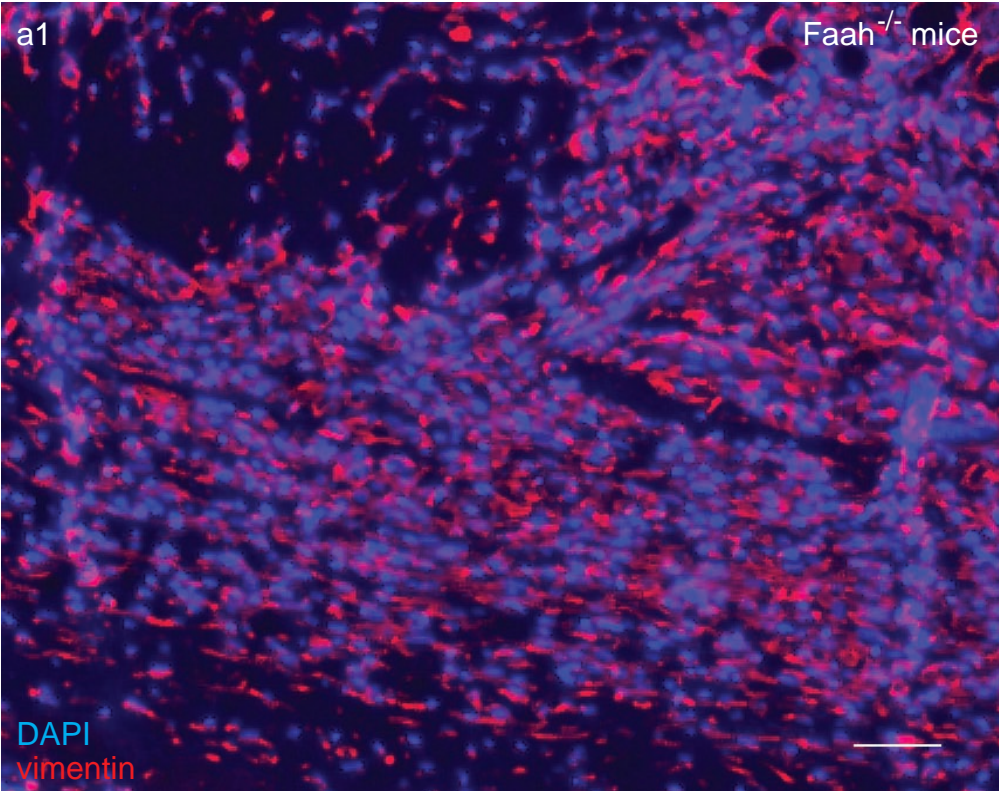

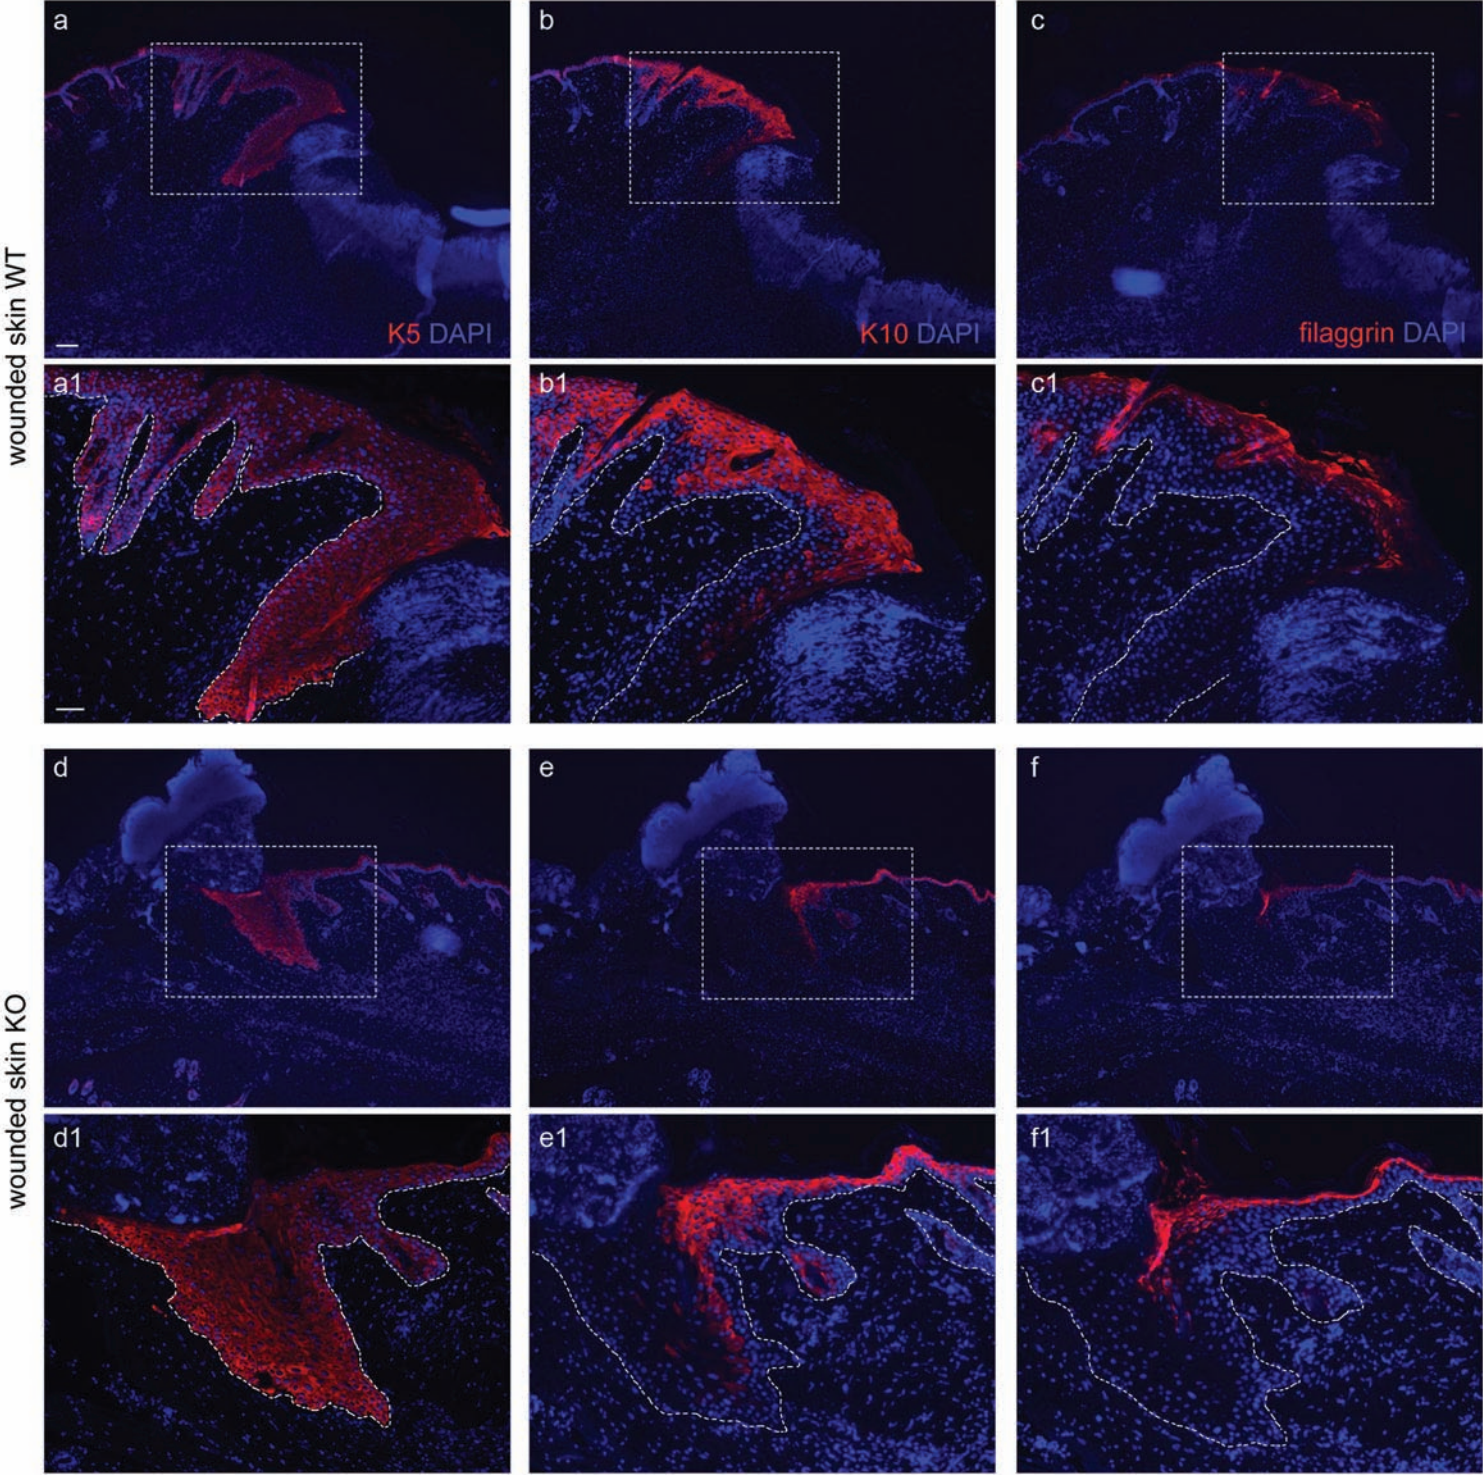

Supplemental Figure 6

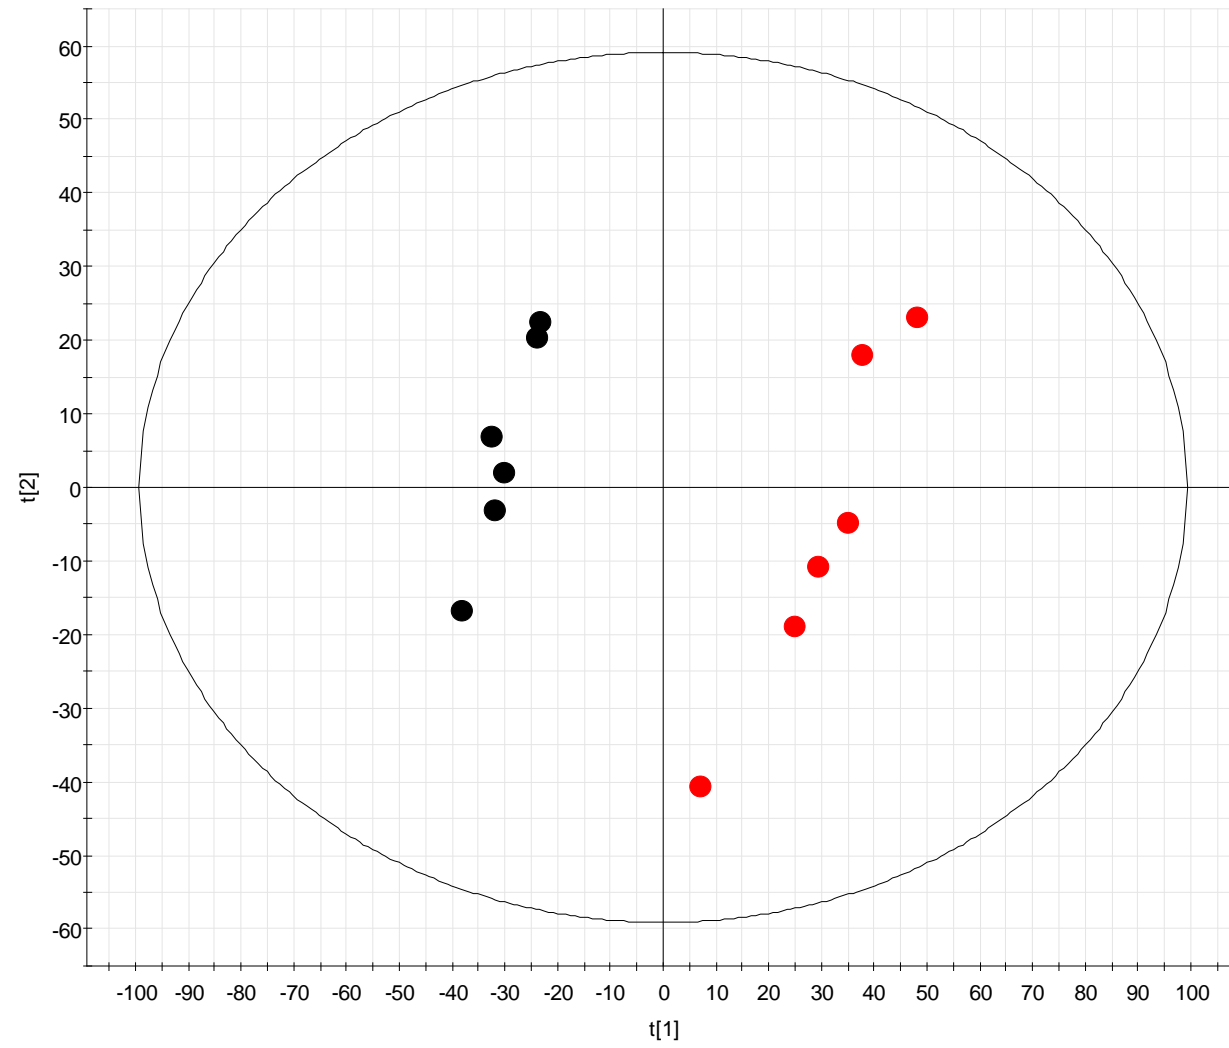



a

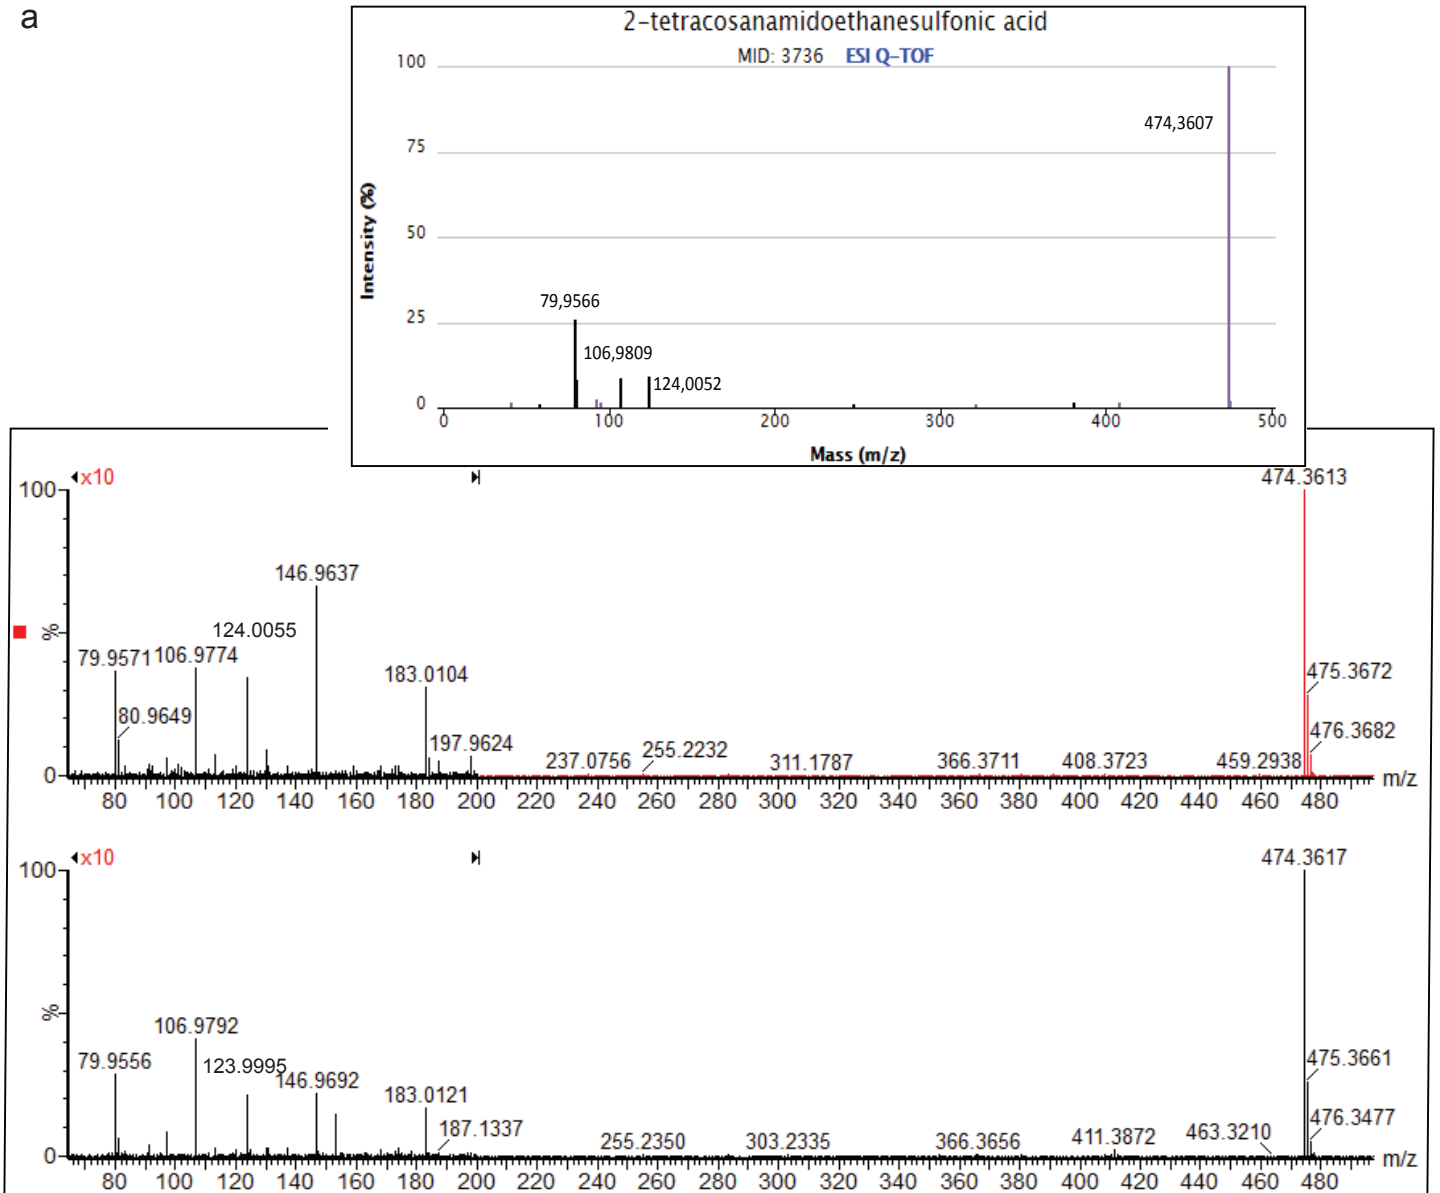

b

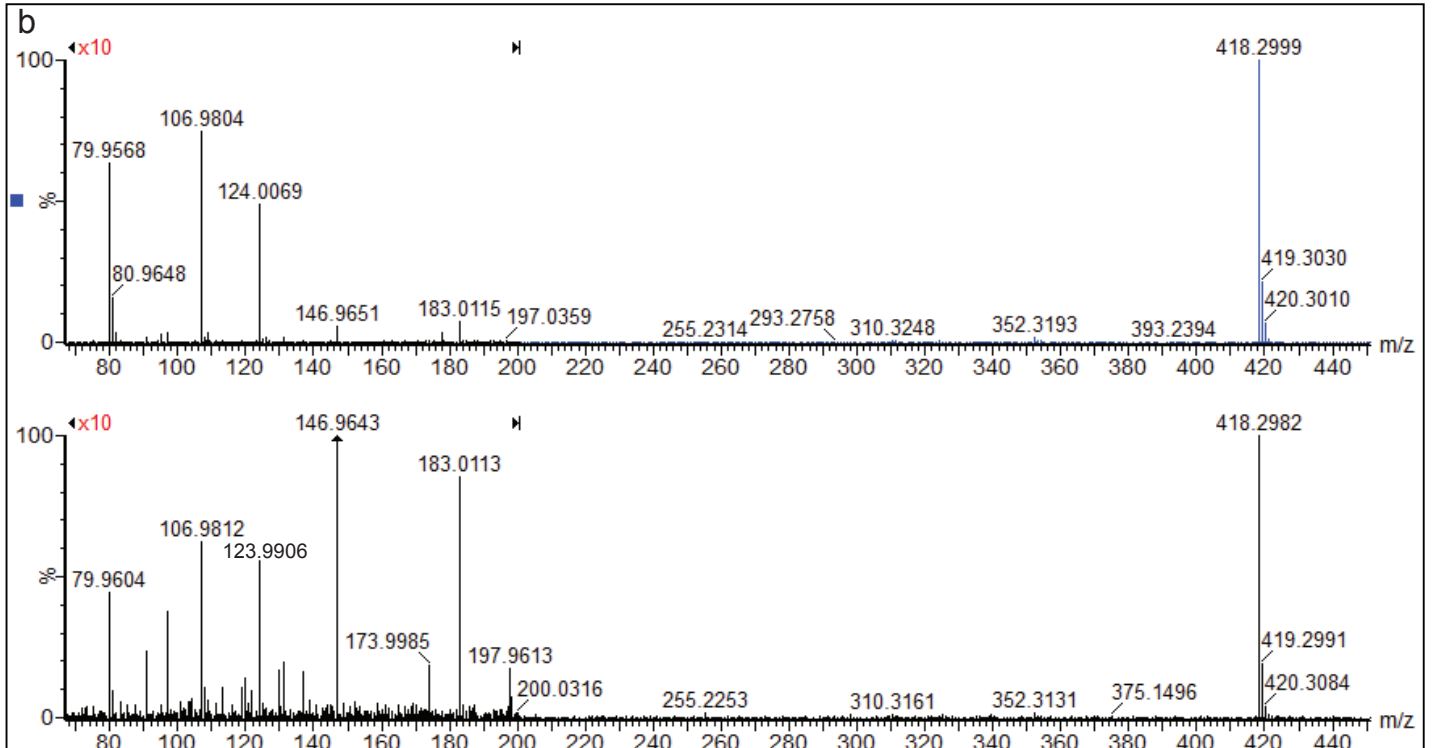

Supplemental Figure 8

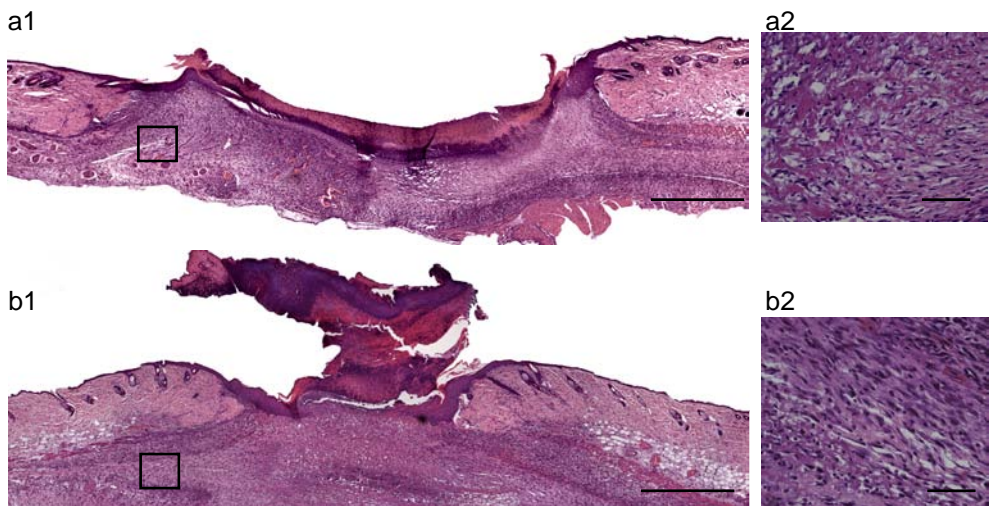

Supplemental Figure 9

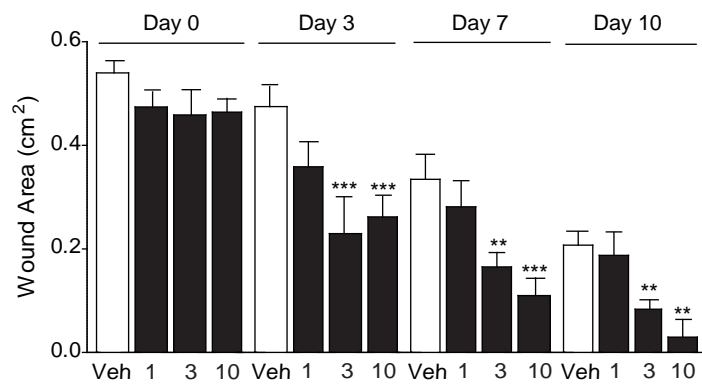

Supplemental Figure 10

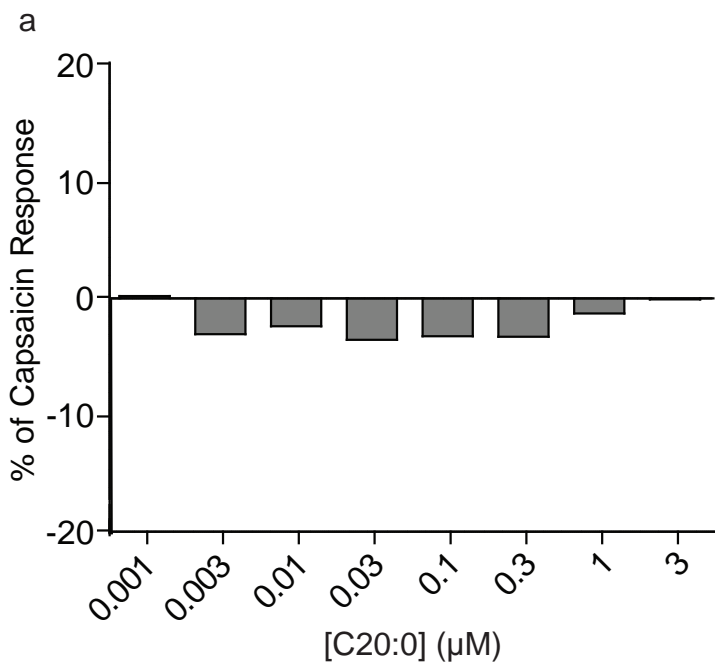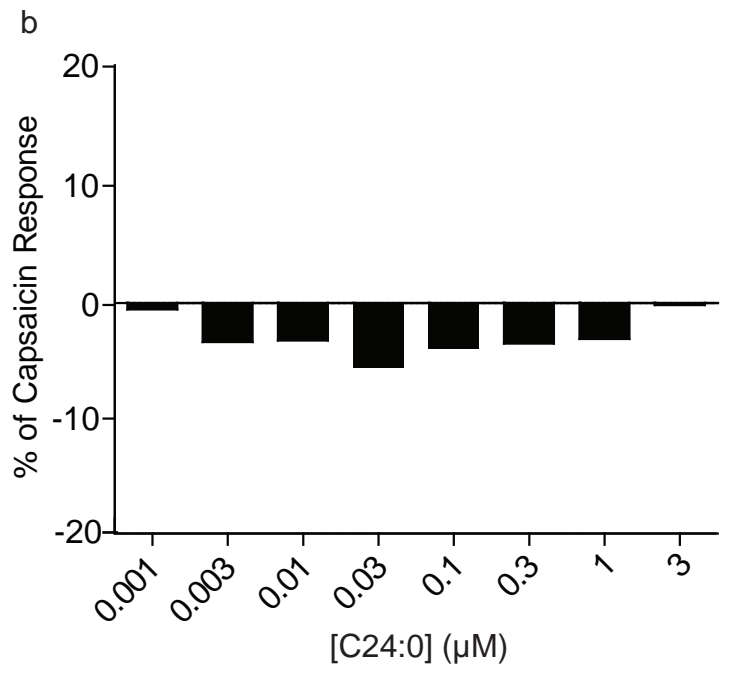

**Supplementary Table 1:** Untargeted lipidomics analysis of skin in wild-type (WT) and *Faah*<sup>-/-</sup> mice, negative ion mode. Columns marked WT and *Faah*<sup>-/-</sup> show signal intensities for all analytes detected in the two sets of samples.

**Abbreviations:**

|            |                          |
|------------|--------------------------|
| <b>FAE</b> | Fatty Acyl Ethanolamide  |
| <b>FA</b>  | Fatty Acid               |
| <b>PA</b>  | Phosphatidic Acid        |
| <b>PE</b>  | Phosphatidylcholine      |
| <b>PC</b>  | Phosphatidylethanolamine |
| <b>NAG</b> | N-Acyl Glycine           |
| <b>NAT</b> | N-Acyl Taurine           |
| <b>Cer</b> | Ceramide                 |
| <b>MG</b>  | Monoacylglycerol         |
| <b>DG</b>  | Diacylglycerol           |
| <b>WE</b>  | Wax Ester                |

| Lipid Class | Type           | Tentative Identificaiton | Adduct Type | ppm | RT    | <i>m/z</i> | WT           | <i>Faah</i> <sup>-/-</sup> | P-value | Percent Change | Regulation in <i>Faah</i> <sup>-/-</sup> |
|-------------|----------------|--------------------------|-------------|-----|-------|------------|--------------|----------------------------|---------|----------------|------------------------------------------|
| Fatty Acyl  | N-Acyl Taurine | 25:0 NAT                 | [M-H]-      | 1   | 8,25  | 488.3770   | <b>0,004</b> | <b>0,088</b>               | 1,3E-06 | 2237%          | UP                                       |
| Fatty Acyl  | N-Acyl Taurine | 24:0 NAT                 | [M-H]-      | 2   | 7,79  | 474.3611   | <b>0,083</b> | <b>1,546</b>               | 5,6E-07 | 1757%          | UP                                       |
| Fatty Acyl  | N-Acyl Taurine | 26:0 NAT                 | [M-H]-      | 4   | 8,67  | 502.3915   | <b>0,006</b> | <b>0,079</b>               | 2,5E-05 | 1173%          | UP                                       |
| Fatty Acyl  | N-Acyl Taurine | 24:1 NAT                 | [M-H]-      | 0   | 6,75  | 472.3462   | <b>0,005</b> | <b>0,057</b>               | 2,6E-06 | 1172%          | UP                                       |
| Fatty Acyl  | N-Acyl Taurine | 23:0 NAT                 | [M-H]-      | 3   | 7,30  | 460.3448   | <b>0,008</b> | <b>0,092</b>               | 7,4E-06 | 1051%          | UP                                       |
| Fatty Acyl  | N-Acyl Taurine | 22:0 NAT                 | [M-H]-      | 1   | 6,75  | 446.3302   | <b>0,016</b> | <b>0,169</b>               | 1,9E-06 | 964%           | UP                                       |
| Fatty Acyl  | N-Acyl Taurine | 20:0 NAT                 | [M-H]-      | 2   | 5,49  | 418.2978   | <b>0,033</b> | <b>0,121</b>               | 5,2E-05 | 265%           | UP                                       |
| Fatty Acyl  | Fatty Acid     | 28:1 FA                  | [M-H]-      | 4   | 10,79 | 421.4032   | <b>0,043</b> | <b>0,109</b>               | 7,3E-03 | 155%           | UP                                       |
| Fatty Acyl  | Fatty Acid     | 22:1 FA                  | [M-H]-      | 1   | 8,47  | 337.3107   | <b>0,319</b> | <b>0,746</b>               | 5,4E-05 | 134%           | UP                                       |
| Fatty Acyl  | Fatty Acid     | 21:0 FA                  | [M-H]-      | 4   | 8,81  | 325.3097   | <b>0,061</b> | <b>0,124</b>               | 9,7E-07 | 103%           | UP                                       |
| Fatty Acyl  | Fatty Acid     | 19:0 FA                  | [M-H]-      | 3   | 7,71  | 297.2788   | <b>0,068</b> | <b>0,137</b>               | 1,3E-05 | 102%           | UP                                       |
| Fatty Acyl  | Fatty Acid     | 16:1 FA                  | [M-H]-      | 3   | 4,68  | 253.2163   | <b>2,968</b> | <b>5,847</b>               | 7,2E-04 | 97%            | UP                                       |
| Fatty Acyl  | Fatty Acid     | 16:0 FA                  | [M-H]-      | 4   | 5,77  | 255.2317   | <b>0,027</b> | <b>0,051</b>               | 1,1E-03 | 92%            | UP                                       |

|              |                         |                      |            |   |       |          |              |              |         |     |    |
|--------------|-------------------------|----------------------|------------|---|-------|----------|--------------|--------------|---------|-----|----|
| Fatty Acyl   | N-Acyl Glycine          | 18:0 NAG             | [M-H]-     | 5 | 12,23 | 340.2839 | <b>0,079</b> | <b>0,142</b> | 2,3E-02 | 80% | UP |
| Fatty Acyl   | Fatty Acid              | 26:1 FA              | [M-H]-     | 3 | 10,13 | 393.3723 | <b>0,061</b> | <b>0,109</b> | 3,4E-04 | 79% | UP |
| Fatty Acyl   | Fatty Acid              | 24:1 FA              | [M-H]-     | 2 | 9,37  | 365.3415 | <b>0,193</b> | <b>0,339</b> | 5,0E-04 | 75% | UP |
| Sphingolipid | Ceramide                | Cer(t18:0/18:0)      | [M-H]-     | 3 | 10,62 | 582.5396 | <b>0,054</b> | <b>0,090</b> | 3,3E-04 | 66% | UP |
| Fatty Acyl   | Wax Ester               | WE(16:1/14:0)        | [M-H]-     | 0 | 11,34 | 449.4360 | <b>0,114</b> | <b>0,188</b> | 2,6E-04 | 64% | UP |
| Fatty Acyl   | Hydroxy Fatty Acid      | 18:1(OH) FA          | [M-H]-     | 2 | 2,95  | 297.2412 | <b>0,049</b> | <b>0,079</b> | 1,2E-05 | 61% | UP |
| Fatty Acyl   | Fatty Acid              | 20:2(OH) FA          | [M-H2O-H]- | 3 | 5,87  | 305.2471 | <b>0,128</b> | <b>0,203</b> | 4,0E-04 | 58% | UP |
| Fatty Acyl   | Fatty Acid              | 22:6 FA              | [M-H]-     | 2 | 7,62  | 327.2334 | <b>0,035</b> | <b>0,054</b> | 2,7E-04 | 57% | UP |
| Fatty Acyl   | Fatty Acid              | 17:0 FA              | [M-H]-     | 2 | 6,44  | 269.2479 | <b>0,091</b> | <b>0,142</b> | 2,4E-05 | 56% | UP |
| Sphingolipid | Ceramide                | Cer(d18:1/16:0(OH)   | [M+FA-H]-  | 2 | 10,06 | 598.5036 | <b>0,142</b> | <b>0,220</b> | 2,1E-02 | 56% | UP |
| Sphingolipid | Ceramide                | Cer(d18:1/20:0)      | [M-H]-     | 1 | 11,42 | 592.5665 | <b>0,231</b> | <b>0,350</b> | 6,8E-04 | 52% | UP |
| Fatty Acyl   | Fatty Acid              | 20:5 FA              | [M-H]-     | 2 | 3,91  | 301.2165 | <b>0,123</b> | <b>0,177</b> | 1,4E-03 | 44% | UP |
| Fatty Acyl   | Hydroxy Fatty Acid      | 16:0(OH) FA          | [M-H]-     | 1 | 2,58  | 271.2274 | <b>0,132</b> | <b>0,188</b> | 1,3E-04 | 42% | UP |
| Fatty Acyl   | Wax Ester               | WE(16:1/16:0)        | [M-H]-     | 5 | 11,83 | 477.4631 | <b>0,259</b> | <b>0,367</b> | 5,0E-03 | 42% | UP |
| Fatty Acyl   | Dicarboxylic Fatty Acid | 30:0 Dicarboxylic FA | [M-H]-     | 1 | 9,44  | 467.4464 | <b>0,269</b> | <b>0,379</b> | 1,8E-03 | 41% | UP |
| Sphingolipid | Ceramide                | Cer(d18:1/16:0)      | [M+FA-H]-  | 1 | 10,34 | 582.5096 | <b>0,773</b> | <b>1,067</b> | 1,5E-03 | 38% | UP |
| Fatty Acyl   | Fatty Acid              | 24:6 FA              | [M-H]-     | 2 | 5,59  | 355.2632 | <b>0,033</b> | <b>0,045</b> | 1,1E-03 | 38% | UP |
| Fatty Acyl   | Dicarboxylic Fatty Acid | 24:0 Dicarboxylic FA | [M-H]-     | 3 | 8,08  | 397.3304 | <b>0,064</b> | <b>0,088</b> | 2,3E-02 | 36% | UP |
| Fatty Acyl   | Keto Fatty Acid         | 20:1 (O) FA          | [M+FA-H]-  | 4 | 9,80  | 453.3930 | <b>0,040</b> | <b>0,055</b> | 3,4E-02 | 36% | UP |
| Sphingolipid | Ceramide                | Cer(d18:1/16:1)      | [M-H]-     | 4 | 9,77  | 534.4866 | <b>0,046</b> | <b>0,062</b> | 2,2E-02 | 35% | UP |
| Fatty Acyl   | Fatty Acid              | 20:0 FA              | [M-H]-     | 3 | 8,45  | 311.2945 | <b>0,104</b> | <b>0,138</b> | 3,7E-03 | 34% | UP |
| Fatty Acyl   | Dicarboxylic Fatty Acid | 31:0 Dicarboxylic FA | [M-H]-     | 2 | 10,46 | 481.4232 | <b>0,061</b> | <b>0,081</b> | 2,8E-02 | 33% | UP |
| Fatty Acyl   | Hydroxy Fatty Acid      | 28:0(OH) FA          | [M-H]-     | 0 | 8,68  | 439.4156 | <b>0,036</b> | <b>0,047</b> | 1,7E-02 | 32% | UP |
| Fatty Acyl   | Dicarboxylic Fatty Acid | 26:0 Dicarboxylic FA | [M-H]-     | 2 | 9,02  | 425.3669 | <b>0,096</b> | <b>0,125</b> | 1,7E-02 | 31% | UP |
| Fatty Acyl   | Acyl-carnitine          | 26:0 Carnitine       | [M-H]-     | 2 | 9,72  | 538.4828 | <b>1,998</b> | <b>2,612</b> | 1,4E-02 | 31% | UP |

|                         |                                  |                                                                                                                      |                |   |       |          |              |              |         |      |      |
|-------------------------|----------------------------------|----------------------------------------------------------------------------------------------------------------------|----------------|---|-------|----------|--------------|--------------|---------|------|------|
| Fatty Acyl              | Fatty Acid                       | 21:1 FA                                                                                                              | [M-H]-         | 2 | 7,95  | 323.2947 | <b>0,121</b> | <b>0,083</b> | 3,8E-03 | -31% | DOWN |
| GlyceroPhos<br>phoLipid | Lysophosphatid<br>ylcholine      | LysoPC(16:0)                                                                                                         | [M-H]-         | 2 | 4,00  | 494.3239 | <b>0,062</b> | <b>0,039</b> | 9,6E-04 | -36% | DOWN |
| Fatty Acyl              | Fatty Acid                       | 24:4 FA                                                                                                              | [M-H]-         | 1 | 7,09  | 359.2949 | <b>0,054</b> | <b>0,034</b> | 3,2E-05 | -38% | DOWN |
| GlyceroPhos<br>phoLipid | Lysophosphatid<br>ylethanolamine | LysoPE(22:4)                                                                                                         | [M-H]-         | 1 | 2,18  | 528.3086 | <b>0,108</b> | <b>0,064</b> | 2,2E-05 | -41% | DOWN |
| Glycerolipid            | Monoacylglycer<br>ol             | (O-16:0/0:0/0:0)<br>MG                                                                                               | [M-H2O-<br>H]- | 4 | 7,93  | 297.2781 | <b>0,049</b> | <b>0,029</b> | 4,8E-02 | -41% | DOWN |
| Sterol Lipid            | Vit d3<br>Derivative             | 1a,25-dihydroxy-<br>11-(3-hydroxy-1-<br>propynyl)-9,11-<br>didehydrovitamin<br>D3                                    | [M-H]-         | 3 | 6,68  | 467.3183 | <b>0,036</b> | <b>0,021</b> | 4,3E-03 | -42% | DOWN |
| GlyceroPhos<br>phoLipid | Lysophosphatid<br>ylcholine      | LysoPC(20:4)                                                                                                         | [M-H]-         | 1 | 2,18  | 588.3298 | <b>0,055</b> | <b>0,030</b> | 4,4E-04 | -46% | DOWN |
| GlyceroPhos<br>phoLipid | Lysophosphatid<br>ylcholine      | LysoPC(18:0)                                                                                                         | [M-H]-         | 1 | 4,47  | 568.3612 | <b>0,037</b> | <b>0,016</b> | 5,8E-05 | -57% | DOWN |
| GlyceroPhos<br>phoLipid | Lysophosphatid<br>ylethanolamine | LysoPE(20:0)                                                                                                         | [M-H]-         | 0 | 4,46  | 508.3407 | <b>0,064</b> | <b>0,026</b> | 7,3E-05 | -60% | DOWN |
| Sphingolipid            | Ceramide                         | Cer(d18:0/18:0)                                                                                                      | [M-H]-         | 5 | 10,38 | 566.5153 | <b>0,295</b> | <b>0,117</b> | 3,4E-04 | -60% | DOWN |
| Sterol Lipid            | Vitamin D3<br>Derivative         | 1a-hydroxy-18-[m-<br>(1-hydroxy-1-<br>ethylpropyl)-<br>benzyloxy]-<br>23,24,25,26,27-<br>pentanorcholecalcif<br>erol | [M-H2O-<br>H]- | 3 | 8,23  | 503.3510 | <b>0,047</b> | <b>0,017</b> | 2,5E-05 | -63% | DOWN |
| Fatty Acyl              | Hydroxy Fatty<br>Acid            | 19:1 (OH) FA                                                                                                         | [M-H]-         | 0 | 3,55  | 311.2590 | <b>0,102</b> | <b>0,037</b> | 1,0E-05 | -64% | DOWN |
| Glycerolipid            | Monoacylglycer<br>ol             | 24:0 MG                                                                                                              | [M+FA-<br>H]-  | 0 | 9,59  | 487.4005 | <b>0,044</b> | <b>0,015</b> | 3,6E-02 | -66% | DOWN |
| GlyceroPhos<br>phoLipid | Lysophosphatidi<br>c Acid        | LysoPA(16:0)                                                                                                         | [M-H]-         | 3 | 3,25  | 391.2242 | <b>0,048</b> | <b>0,016</b> | 6,8E-05 | -67% | DOWN |
| GlyceroPhos<br>phoLipid | Lysophosphatidi<br>c Acid        | LysoPA(18:0)                                                                                                         | [M-H]-         | 2 | 4,75  | 419.2545 | <b>0,038</b> | <b>0,011</b> | 6,8E-04 | -72% | DOWN |
| Fatty Acyl              | Fatty Acid                       | 19:1 FA                                                                                                              | [M-H]-         | 4 | 6,78  | 295.2630 | <b>0,220</b> | <b>0,051</b> | 5,4E-03 | -77% | DOWN |
| GlyceroPhos<br>phoLipid | Lysophosphatid<br>ylcholine      | LysoPC(18:1)                                                                                                         | [M-H]-         | 4 | 4,18  | 520.3387 | <b>0,049</b> | <b>0,008</b> | 3,1E-07 | -84% | DOWN |

**Supplementary Table 2:** Untargeted lipidomics analysis of skin in wild-type (WT) and *Faah*<sup>-/-</sup> mice, positive ion mode. Columns marked WT and *Faah*<sup>-/-</sup> show signal intensities for all analytes detected in the two sets of samples.

**Abbreviations:**

|             |                          |
|-------------|--------------------------|
| <b>FAE</b>  | Fatty Acyl Ethanolamide  |
| <b>FA</b>   | Fatty Acid               |
| <b>PA</b>   | Phosphatidic Acid        |
| <b>PE</b>   | Phosphatidylcholine      |
| <b>PC</b>   | Phosphatidylethanolamine |
| <b>NAG</b>  | N-Acyl Glycine           |
| <b>NAT</b>  | N-Acyl Taurine           |
| <b>Cer</b>  | Ceramide                 |
| <b>MG</b>   | Monoacylglycerol         |
| <b>DG</b>   | Diacylglycerol           |
| <b>WE</b>   | Wax Ester                |
| <b>GABA</b> | Gamma Aminobutyric Acid  |

| Lipid Class  | Type                   | Tentative ID      | Adduct Type            | ppm | RT    | <i>m/z</i> | WT          | <i>Faah</i> <sup>-/-</sup> | P-value | Percent Change | Regulation in <i>Faah</i> <sup>-/-</sup> |
|--------------|------------------------|-------------------|------------------------|-----|-------|------------|-------------|----------------------------|---------|----------------|------------------------------------------|
| Fatty Acyl   | N-Acyl Taurine         | 26:0 NAT          | [M+H] <sup>+</sup>     | 2   | 8,70  | 504.4069   | <b>0,00</b> | <b>0,23</b>                | 1,8E-02 | 22948%         | UP                                       |
| Fatty Acyl   | N-Acyl Taurine         | 24:0 NAT          | [M+H] <sup>+</sup>     | 1   | 7,85  | 476.3776   | <b>0,29</b> | <b>5,44</b>                | 7,5E-06 | 1761%          | UP                                       |
| Fatty Acyl   | N-Acyl Taurine         | 25:0 NAT          | [M+H] <sup>+</sup>     | 2   | 8,30  | 490.3913   | <b>0,02</b> | <b>0,27</b>                | 5,9E-06 | 1422%          | UP                                       |
| Fatty Acyl   | N-Acyl Taurine         | 23:0 NAT          | [M+H] <sup>+</sup>     | 2   | 7,36  | 462.3601   | <b>0,02</b> | <b>0,25</b>                | 1,9E-05 | 1192%          | UP                                       |
| Fatty Acyl   | N-Acyl Taurine         | 22:0 NAT          | [M+H] <sup>+</sup>     | 1   | 6,80  | 448.3447   | <b>0,04</b> | <b>0,32</b>                | 6,4E-05 | 643%           | UP                                       |
| Fatty Acyl   | Oxygenated hydrocarbon | 32:0 (O)          | [M+NH4] <sup>+</sup>   | 2   | 12,16 | 482.5308   | <b>0,05</b> | <b>0,19</b>                | 4,9E-03 | 288%           | UP                                       |
| Glycerolipid | Diacylglycerol         | (32:3) DG         | [M+H] <sup>+</sup>     | 4   | 10,63 | 397.3321   | <b>0,09</b> | <b>0,16</b>                | 3,5E-02 | 88%            | UP                                       |
| Glycerolipid | Diacylglycerol         | (32:1) DG         | [M-H2O+H] <sup>+</sup> | 3   | 10,80 | 567.4997   | <b>0,45</b> | <b>0,81</b>                | 4,5E-03 | 81%            | UP                                       |
| Sphingolipid | Ceramide               | Cer(d18:1/20:2)   | [M+H] <sup>+</sup>     | 1   | 10,98 | 590.5516   | <b>2,95</b> | <b>5,18</b>                | 1,1E-02 | 76%            | UP                                       |
| Fatty Acyl   | Wax ester              | Retinyl linoleate | [M+H] <sup>+</sup>     | 3   | 13,18 | 549.4848   | <b>0,12</b> | <b>0,20</b>                | 3,5E-03 | 63%            | UP                                       |
| Fatty Acyl   | Wax ester              | WE(18:1/18:1)     | [M+H] <sup>+</sup>     | 3   | 12,81 | 533.5312   | <b>0,11</b> | <b>0,17</b>                | 7,8E-04 | 60%            | UP                                       |
| Fatty Acyl   | N-Acyl amines          | N-palmitoyl GABA  | [M+H] <sup>+</sup>     | 5   | 6,60  | 342.3362   | <b>0,15</b> | <b>0,24</b>                | 1,9E-03 | 59%            | UP                                       |
| Fatty Acyl   | Acyl-carnitine         | C26:0 Carnitine   | [M+H] <sup>+</sup>     | 2   | 9,75  | 540.5002   | <b>0,69</b> | <b>1,10</b>                | 2,4E-03 | 58%            | UP                                       |



|                     |                              |                       |                                     |   |       |          |              |              |         |      |      |
|---------------------|------------------------------|-----------------------|-------------------------------------|---|-------|----------|--------------|--------------|---------|------|------|
| Fatty Acyl          | Acyl-carnitine               | 18:1(OH)<br>Carnitine | [M+H] <sup>+</sup>                  | 5 | 5,10  | 442.3890 | <b>1,08</b>  | <b>1,62</b>  | 2,7E-03 | 51%  | UP   |
| Fatty Acyl          | N-Acyl<br>ethanolamide       | 24:0 FAE              | [M+H] <sup>+</sup>                  | 0 | 9,39  | 412.4149 | <b>0,27</b>  | <b>0,40</b>  | 1,8E-02 | 48%  | UP   |
| Sphingolipid        | Ceramide                     | Cer(d18:1/18:1)       | [M+H] <sup>+</sup>                  | 3 | 10,95 | 564.5368 | <b>7,11</b>  | <b>10,51</b> | 2,0E-02 | 48%  | UP   |
| Sphingolipid        | Ceramide                     | Cer(d18:1/20:1)       | [M+H] <sup>+</sup>                  | 0 | 11,19 | 594.5842 | <b>10,09</b> | <b>14,66</b> | 7,9E-03 | 45%  | UP   |
| Fatty Acyl          | N-Acyl<br>ethanolamide       | 16:0 FAE              | [M+H] <sup>+</sup>                  | 1 | 4,64  | 300.2901 | <b>9,25</b>  | <b>13,38</b> | 6,3E-03 | 45%  | UP   |
| Glycerolipid        | Diacylglycerol               | (34:3) DG             | [M+H] <sup>+</sup>                  | 2 | 10,01 | 591.4999 | <b>0,54</b>  | <b>0,78</b>  | 4,4E-02 | 44%  | UP   |
| Fatty Acyl          | N-Acyl<br>ethanolamide       | 17:0 FAE              | [M+H] <sup>+</sup>                  | 2 | 5,15  | 314.3061 | <b>0,20</b>  | <b>0,28</b>  | 2,4E-03 | 41%  | UP   |
| Sphingolipid        | Ceramide                     | Cer(d18:1/20:0)       | [M+H] <sup>+</sup>                  | 0 | 11,45 | 592.5667 | <b>0,22</b>  | <b>0,30</b>  | 1,1E-02 | 38%  | UP   |
| Fatty Acyl          | N-Acyl<br>ethanolamide       | 18:0 FAE              | [M+H] <sup>+</sup>                  | 0 | 6,17  | 328.3213 | <b>21,14</b> | <b>28,10</b> | 1,4E-02 | 33%  | UP   |
| Fatty Acyl          | Fatty Acid                   | 18:4 FA               | [M+Na] <sup>+</sup>                 | 0 | 4,73  | 299.1984 | <b>0,20</b>  | <b>0,26</b>  | 2,1E-03 | 31%  | UP   |
| GlycerophosphoLipid | Lysophosphatidylcholine      | LysoPC(14:0)          | [M+H] <sup>+</sup>                  | 0 | 1,91  | 468.3082 | <b>0,35</b>  | <b>0,25</b>  | 1,3E-03 | -31% | DOWN |
| Fatty Acyl          | Wax ester                    | Oleyl<br>palmitoelate | [M+H] <sup>+</sup>                  | 2 | 10,18 | 505.4994 | <b>0,11</b>  | <b>0,07</b>  | 3,2E-02 | -31% | DOWN |
| GlycerophosphoLipid | Lysophosphatidylethanolamine | LysoPE(20:0)          | [M+H] <sup>+</sup>                  | 0 | 6,95  | 566.4182 | <b>0,28</b>  | <b>0,20</b>  | 5,6E-03 | -31% | DOWN |
| GlycerophosphoLipid | Lysophosphatidylethanolamine | LysoPE(20:2)          | [M+H] <sup>+</sup>                  | 0 | 3,88  | 548.3711 | <b>0,41</b>  | <b>0,28</b>  | 2,8E-02 | -32% | DOWN |
| Glycerolipid        | Monoacylglycerol             | 18:0 MG               | [M+Na] <sup>+</sup>                 | 0 | 6,79  | 381.2974 | <b>0,24</b>  | <b>0,16</b>  | 3,1E-04 | -34% | DOWN |
| Glycerolipid        | Monoacylglycerol             | 24:0 MG               | [M+H] <sup>+</sup>                  | 4 | 9,69  | 443.4114 | <b>3,73</b>  | <b>2,41</b>  | 2,8E-02 | -35% | DOWN |
| GlycerophosphoLipid | Lysophosphatidylethanolamine | LysoPE(20:4)          | [M+H] <sup>+</sup>                  | 3 | 2,27  | 442.3532 | <b>0,56</b>  | <b>0,36</b>  | 1,3E-03 | -36% | DOWN |
| Glycerolipid        | Monoacylglycerol             | 16:0 MG               | [M+Na] <sup>+</sup>                 | 0 | 5,40  | 353.2663 | <b>0,25</b>  | <b>0,16</b>  | 5,2E-04 | -36% | DOWN |
| GlycerophosphoLipid | Lysophosphatidylcholine      | LysoPC(20:3)          | [M+H] <sup>+</sup>                  | 2 | 4,86  | 546.3540 | <b>5,41</b>  | <b>3,40</b>  | 1,8E-05 | -37% | DOWN |
| GlycerophosphoLipid | Lysophosphatidylcholine      | LysoPC(20:4)          | [M+H] <sup>+</sup>                  | 4 | 3,54  | 544.3373 | <b>0,26</b>  | <b>0,16</b>  | 9,5E-03 | -38% | DOWN |
| Glycerolipid        | Diacylglycerol               | (32:0) DG             | [M-H <sub>2</sub> O+H] <sup>+</sup> | 4 | 12,14 | 551.5063 | <b>0,10</b>  | <b>0,06</b>  | 2,3E-02 | -39% | DOWN |
| GlycerophosphoLipid | Lysophosphatidylserine       | LysoPS(O-20)          | [M+H] <sup>+</sup>                  | 1 | 3,69  | 540.3670 | <b>0,21</b>  | <b>0,13</b>  | 1,2E-03 | -40% | DOWN |
| Glycerolipid        | Monoacylglycerol             | 22:0 MG               | [M+Na] <sup>+</sup>                 | 0 | 8,88  | 437.3601 | <b>0,34</b>  | <b>0,20</b>  | 1,8E-05 | -40% | DOWN |
| GlycerophosphoLipid | Lysophosphatidylcholine      | LysoPC(P-18:1)        | [M+H] <sup>+</sup>                  | 0 | 4,85  | 506.3601 | <b>0,17</b>  | <b>0,10</b>  | 8,7E-04 | -41% | DOWN |

|                     |                              |                     |                                     |   |       |          |             |             |         |       |      |
|---------------------|------------------------------|---------------------|-------------------------------------|---|-------|----------|-------------|-------------|---------|-------|------|
| hoLipid             | oline                        |                     |                                     |   |       |          |             |             |         |       |      |
| Glycerolipid        | Diacylglycerol               | (28:2) DG           | [M+H] <sup>+</sup>                  | 1 | 7,32  | 509.4195 | <b>0,26</b> | <b>0,14</b> | 2,1E-02 | -44%  | DOWN |
| GlycerophosphoLipid | Lysophosphatidylcholine      | LysoPC(18:2)        | [M-H <sub>2</sub> O+H] <sup>+</sup> | 0 | 2,43  | 544.3403 | <b>0,87</b> | <b>0,45</b> | 3,3E-03 | -48%  | DOWN |
| Sphingolipid        | Sphinganine                  | Sphinganine         | [M+H] <sup>+</sup>                  | 0 | 3,08  | 302.3055 | <b>4,55</b> | <b>2,06</b> | 4,6E-03 | -55%  | DOWN |
| Glycerolipid        | Diacylglycerol               | (36:4)DG            | [M-H <sub>2</sub> O+H] <sup>+</sup> | 0 | 10,47 | 599.5059 | <b>2,79</b> | <b>1,18</b> | 7,6E-03 | -58%  | DOWN |
| GlycerophosphoLipid | Lysophosphatidylcholine      | LysoPC(18:0)        | [M+H] <sup>+</sup>                  | 1 | 4,53  | 524.3717 | <b>3,70</b> | <b>1,54</b> | 4,1E-05 | -58%  | DOWN |
| GlycerophosphoLipid | Lysophosphatidylcholine      | LysoPC(22:4)        | [M+H] <sup>+</sup>                  | 0 | 3,26  | 572.3713 | <b>0,25</b> | <b>0,10</b> | 2,2E-06 | -59%  | DOWN |
| Glycerolipid        | Diacylglycerol               | (36:5)DG            | [M-H <sub>2</sub> O+H] <sup>+</sup> | 0 | 10,03 | 597.4881 | <b>0,18</b> | <b>0,06</b> | 4,7E-03 | -65%  | DOWN |
| GlycerophosphoLipid | Lysophosphatidylethanolamine | LysoPE(22:1)        | [M+H] <sup>+</sup>                  | 0 | 3,93  | 536.3715 | <b>1,13</b> | <b>0,36</b> | 1,1E-04 | -68%  | DOWN |
| GlycerophosphoLipid | Lysophosphatidylcholine      | LysoPC(22:5)        | [M+H] <sup>+</sup>                  | 0 | 2,84  | 570.3545 | <b>0,11</b> | <b>0,03</b> | 1,8E-04 | -71%  | DOWN |
| GlycerophosphoLipid | Lysophosphatidic acid        | 16:0 PA             | [M-H <sub>2</sub> O+H] <sup>+</sup> | 1 | 3,31  | 393.2399 | <b>0,27</b> | <b>0,07</b> | 1,3E-03 | -75%  | DOWN |
| GlycerophosphoLipid | Lysophosphatidic acid        | 18:0 PA             | [M-H <sub>2</sub> O+H] <sup>+</sup> | 0 | 4,82  | 421.2716 | <b>0,18</b> | <b>0,04</b> | 5,8E-04 | -80%  | DOWN |
| Sphingolipid        | Ceramide                     | Cer(d18:1/14:0)     | [M-H <sub>2</sub> O+H] <sup>+</sup> | 2 | 9,73  | 492.4795 | <b>0,15</b> | <b>0,00</b> | 7,5E-05 | -100% | DOWN |
| Sterol Lipid        | Cholesteryl ester            | Cholesteryl acetate | [M+H] <sup>+</sup>                  | 0 | 8,55  | 429.3728 | <b>0,20</b> | <b>0,00</b> | 7,7E-05 | -100% | DOWN |
| Glycerolipid        | Diacylglycerol               | (16:0e/18:0) DG     | [M-H <sub>2</sub> O+H] <sup>+</sup> | 0 | 12,14 | 565.5550 | <b>0,34</b> | <b>0,00</b> | 1,4E-04 | -100% | DOWN |
| Glycerolipid        | Diacylglycerol               | (34:1) DG           | [M-H <sub>2</sub> O+H] <sup>+</sup> | 3 | 10,37 | 577.5184 | <b>0,31</b> | <b>0,00</b> | 5,5E-04 | -100% | DOWN |
| GlycerophosphoLipid | Lysophosphatidylcholine      | LysoPC(22:6)        | [M+H] <sup>+</sup>                  | 0 | 2,26  | 568.3403 | <b>0,39</b> | <b>0,00</b> | 2,1E-02 | -100% | DOWN |

| Target                                                                                   | Reference                                                                  | 1 <sup>st</sup> | 2 <sup>nd</sup> | Mean  |
|------------------------------------------------------------------------------------------|----------------------------------------------------------------------------|-----------------|-----------------|-------|
| A <sub>1</sub> (h) (antagonist radioligand)                                              | DPCPX                                                                      | -0.1            | 10.6            | 5.3   |
| A <sub>2A</sub> (h) (agonist radioligand)                                                | NECA                                                                       | -6.4            | 2.5             | -1.9  |
| A <sub>3</sub> (h) (agonist radioligand)                                                 | IB-MECA                                                                    | 2.3             | -11.4           | -4.6  |
| α <sub>1</sub> (non-selective) (antagonist radioligand)                                  | Prazosin                                                                   | -4.5            | 3.0             | -0.8  |
| α <sub>2</sub> (non-selective) (antagonist radioligand)                                  | Yohimbine                                                                  | -11.4           | 8.2             | -1.6  |
| β <sub>1</sub> (h) (agonist radioligand)                                                 | Atenolol                                                                   | -1.7            | 1.4             | -0.2  |
| β <sub>2</sub> (h) (agonist radioligand)                                                 | ICI 118551                                                                 | -14.4           | -6.2            | -10.3 |
| AT <sub>1</sub> (h) (antagonist radioligand)                                             | Saralasin                                                                  | 3.3             | 13.1            | 8.2   |
| AT <sub>2</sub> (h) (agonist radioligand)                                                | Angiotensin-II                                                             | -12.8           | -6.4            | -9.6  |
| BZD (central) (agonist radioligand)                                                      | Diazepam                                                                   | -9.2            | -8.2            | -8.7  |
| B <sub>1</sub> (h) (agonist radioligand)                                                 | desArg <sup>10</sup> -KD                                                   | -3.8            | -4.8            | -4.3  |
| B <sub>2</sub> (h) (agonist radioligand)                                                 | NPC 567                                                                    | 0.6             | -3.0            | -1.2  |
| CB <sub>1</sub> (h) (agonist radioligand)                                                | CP 55940                                                                   | -2.1            | 0.2             | -1.0  |
| CB <sub>2</sub> (h) (agonist radioligand)                                                | WIN 55212-2                                                                | -8.9            | 6.8             | -1.1  |
| CCK <sub>2</sub> (CCKB) (h) (agonist radioligand)                                        | CCK-8s                                                                     | -3.7            | -13.4           | -8.6  |
| CRF <sub>1</sub> (h) (agonist radioligand)                                               | Sauvagine                                                                  | -0.1            | -4.0            | -2.0  |
| D <sub>1</sub> (h) (antagonist radioligand)                                              | SCH 23390                                                                  | 1.1             | -4.6            | -1.8  |
| D <sub>2S</sub> (h) (antagonist radioligand)                                             | (+)Butaclamol                                                              | 28.4            | 56.5            | 42.4  |
| D <sub>3</sub> (h) (antagonist radioligand)                                              | (+)Butaclamol                                                              | -10.3           | -16.5           | -13.4 |
| D <sub>4.4</sub> (h) (antagonist radioligand)                                            | Clozapine                                                                  | 12.5            | 0.5             | 6.5   |
| ETA (h) (agonist radioligand)                                                            | Endothelin-1                                                               | -3.0            | -2.1            | -2.5  |
| ETB (h) (agonist radioligand)                                                            | Endothelin-3                                                               | 2.4             | -8.3            | -2.9  |
| GABA (non-selective) (agonist radioligand)                                               | GABA                                                                       | -0.1            | -2.0            | -1.1  |
| AMPA (agonist radioligand)                                                               | L-glutamate                                                                | -3.3            | -5.6            | -4.4  |
| kainate (agonist radioligand)                                                            | kainic                                                                     | -9.6            | -2.4            | -6.0  |
| NMDA (antagonist radioligand)                                                            | CGS 19755                                                                  | 2.9             | 17.1            | 10.0  |
| H <sub>1</sub> (h) (antagonist radioligand)                                              | Pyrilamine                                                                 | 6.0             | 1.4             | 3.7   |
| H <sub>2</sub> (h) (antagonist radioligand)                                              | Cimetidine                                                                 | -4.8            | -9.8            | -7.3  |
| H <sub>3</sub> (l) (agonist radioligand)                                                 | (R)α-Me-histamine                                                          | -2.4            | -7.9            | -5.1  |
| I <sub>2</sub> (antagonist radioligand)                                                  | Idazoxan                                                                   | -8.5            | -7.9            | -8.2  |
| BLT <sub>1</sub> (LTB <sub>4</sub> ) (h) (agonist radioligand)                           | LTB <sub>4</sub>                                                           | 7.0             | 4.7             | 5.8   |
| CysLT <sub>1</sub> (LTD <sub>4</sub> ) (h) (agonist radioligand)                         | LTD <sub>4</sub>                                                           | 16.0            | 13.9            | 14.9  |
| MC <sub>4</sub> (h) (agonist radioligand)                                                | NDP-α-MSH                                                                  | -6.2            | -3.7            | -4.9  |
| MT <sub>1</sub> (ML <sub>1A</sub> ) (h) (agonist radioligand)                            | Melatonin                                                                  | 9.4             | 4.4             | 6.9   |
| M (non-selective) (antagonist radioligand)                                               | atropine                                                                   | -39.6           | 10.7            | -14.4 |
| NK <sub>1</sub> (h) (agonist radioligand)                                                | [Sar <sup>9</sup> ,Met(O <sub>2</sub> ) <sup>11</sup> ]-SP                 | -16.2           | -17.7           | -16.9 |
| NK <sub>2</sub> (h) (agonist radioligand)                                                | [Nleu <sup>10</sup> ]-NKA                                                  | 15.9            | 3.1             | 9.5   |
| NK <sub>3</sub> (h) (antagonist radioligand)                                             | SB 222200                                                                  | -3.4            | 4.5             | 0.6   |
| Y (non-selective) (agonist radioligand)                                                  | NPY                                                                        | -23.5           | 7.0             | -8.3  |
| N neuronal α4β2 (h) (agonist radioligand)                                                | Nicotine                                                                   | 1.0             | -9.5            | -4.2  |
| opioid (non-selective) (antagonist radioligand)                                          | Naloxone                                                                   | 47.1            | 21.4            | 34.3  |
| NOP (ORL1) (h) (agonist radioligand)                                                     | Nociceptin                                                                 | 1.4             | 1.1             | 1.2   |
| PPARγ (h) (agonist radioligand)                                                          | Rosiglitazone                                                              | -7.5            | 8.0             | 0.2   |
| PCP (antagonist radioligand)                                                             | MK 801                                                                     | 13.2            | 6.9             | 10.0  |
| EP <sub>2</sub> (h) (agonist radioligand)                                                | PGE <sub>2</sub>                                                           | 3.1             | -2.2            | 0.4   |
| IP (PGI <sub>2</sub> ) (h) (agonist radioligand)                                         | Iloprost                                                                   | 3.6             | -8.7            | -2.6  |
| P2X (agonist radioligand)                                                                | α,β-MeATP                                                                  | 19.3            | 1.7             | 10.5  |
| P2Y (agonist radioligand)                                                                | dATPαS                                                                     | 1.4             | 0.4             | 0.9   |
| 5-HT <sub>1</sub> , Non-Selective                                                        | Serotonin (5-HT)                                                           | -4.5            | 5.2             | 0.3   |
| sigma (non-selective) (h) (agonist radioligand)                                          | Haloperidol                                                                | -11.9           | -3.3            | -7.6  |
| GR (h) (agonist radioligand)                                                             | Dexamethasone                                                              | -5.8            | -11.1           | -8.4  |
| ER (non-selective) (h) (agonist radioligand)                                             | 17-β-estradiol                                                             | -27.5           | -20.5           | -24.0 |
| PR (h) (agonist radioligand)                                                             | Promegestone                                                               | -11.0           | -11.5           | -11.2 |
| AR (h) (agonist radioligand)                                                             | Mibolerone                                                                 | -4.6            | 1.3             | -1.7  |
| TRH <sub>1</sub> (h) (agonist radioligand)                                               | TRH                                                                        | -12.5           | 3.8             | -4.3  |
| V1 <sub>a</sub> (h) (agonist radioligand)                                                | [d(CH <sub>2</sub> ) <sub>5</sub> <sup>1</sup> ,Tyr(Me) <sub>2</sub> ]-AVP | 2.1             | 7.3             | 4.7   |
| V2 (h) (agonist radioligand)                                                             | AVP                                                                        | -24.9           | 6.6             | -9.1  |
| Ca <sup>2+</sup> channel (L, dihydropyridine site) (antagonist radioligand)              | Nitrendipine                                                               | 2.8             | -2.5            | 0.2   |
| Ca <sup>2+</sup> channel (L, diltiazem site) (benzothiazepines) (antagonist radioligand) | Diltiazem                                                                  | 7.1             | 3.6             | 5.4   |
| Ca <sup>2+</sup> channel (L, verapamil site) (phenylalkylamine) (antagonist radioligand) | D 600                                                                      | -7.1            | 0.1             | -3.5  |
| K <sub>ATP</sub> channel (antagonist radioligand)                                        | Glibenclamide                                                              | 6.4             | 18.3            | 12.4  |
| K <sub>V</sub> channel (antagonist radioligand)                                          | α-dendrotoxin                                                              | -8.8            | -4.0            | -6.4  |
| SK <sub>Ca</sub> channel (antagonist radioligand)                                        | Apamin                                                                     | 11.3            | -3.6            | 3.9   |
| Na <sup>+</sup> channel (site 2) (antagonist radioligand)                                | Veratridine                                                                | 12.0            | 3.9             | 8.0   |
| Cl <sup>-</sup> channel (GABA-gated) (antagonist radioligand)                            | Picrotoxinin                                                               | 2.2             | -3.3            | -0.5  |
| norepinephrine transporter (h) (antagonist radioligand)                                  | Protriptyline                                                              | -9.2            | -11.4           | -10.3 |
| dopamine transporter (h) (antagonist radioligand)                                        | BTCP                                                                       | -7.4            | 1.6             | -2.9  |
| GABA transporter (antagonist radioligand)                                                | Nipecotin                                                                  | -0.7            | -7.0            | -3.9  |
| choline transporter (CHT1) (h) (antagonist radioligand)                                  | Hemicholinium-3                                                            | -30.4           | -25.2           | -27.8 |

|                                                        |                                                                 |       |       |       |
|--------------------------------------------------------|-----------------------------------------------------------------|-------|-------|-------|
| 5-HT transporter ( <i>h</i> ) (antagonist radioligand) | Imipramine                                                      | -5.4  | -2.0  | -3.7  |
| COX <sub>1</sub> ( <i>h</i> )                          | Diclofenac                                                      | 19.9  | 31.3  | 25.6  |
| 5-lipoxygenase ( <i>h</i> )                            | NDGA                                                            | -2.4  | 15.2  | 6.4   |
| PDE1B ( <i>h</i> )                                     | Nitrendipine                                                    | 32.0  | 28.8  | 30.4  |
| PDE2A1 ( <i>h</i> )                                    | EHNA                                                            | -0.3  | 0.6   | 0.1   |
| PDE3A ( <i>h</i> )                                     | Milrinone                                                       | 3.1   | 0.4   | 1.8   |
| PDE4D <sub>2</sub> ( <i>h</i> )                        | Rolipram                                                        | 2.0   | 1.5   | 1.7   |
| PDE5 ( <i>h</i> ) (non-selective)                      | Dipyridamole                                                    | -18.7 | -6.1  | -12.4 |
| Protein Tyrosine Phosphatase, CDC25A                   | NSC663284                                                       | 6.4   | 9.6   | 8.0   |
| Protein Tyrosine Phosphatase, PTPN1 (PTP1B)            | (NH <sub>4</sub> ) <sub>6</sub> Mo <sub>7</sub> O <sub>24</sub> | 0.0   | -3.5  | -1.8  |
| PKC $\alpha$ ( <i>h</i> )                              | Bis 10                                                          | 0.5   | -14.4 | -7.0  |
| acetylcholinesterase ( <i>h</i> )                      | Neostigmine                                                     | -31.0 | -28.1 | -29.6 |
| COMT                                                   | Ro 41-0960                                                      | 30.1  | 28.6  | 29.4  |
| GABA transaminase                                      | O-(Carboxyméthyl) hydroxylamine hémihydrochloride               | 5.4   | 9.3   | 7.3   |
| MAO-A ( <i>h</i> )                                     | Clorgyline                                                      | 7.1   | 4.0   | 5.6   |
| MAO-B ( <i>h</i> ) recombinant enzyme                  | Deprenyl                                                        | -16.5 | -12.3 | -14.4 |
| Tyrosine Hydroxylase                                   | alpha-Methyl-L-P-Tyrosine                                       | -17.8 | -23.7 | -20.8 |
| ATPase (Na <sup>+</sup> /K <sup>+</sup> )              | Ouabain                                                         | -0.4  | 0.0   | -0.2  |
| CENP-E ( <i>h</i> )                                    | Rose bengal                                                     | 6.6   | 3.6   | 5.1   |
| Eg5 ( <i>h</i> )                                       | S-trityl-L-cysteine                                             | 4.4   | 4.0   | 4.2   |
| HDAC3 ( <i>h</i> )                                     | Trichostatin                                                    | -3.5  | -4.0  | -3.7  |
| HDAC4 ( <i>h</i> )                                     | Trichostatin                                                    | 0.1   | 7.3   | 3.7   |
| HDAC6 ( <i>h</i> )                                     | Trichostatin                                                    | -5.2  | -8.2  | -6.7  |
| HDAC11 ( <i>h</i> )                                    | Scriptaid                                                       | -66.4 | -79.7 | -73.0 |
| sirtuin 1 ( <i>h</i> )                                 | Suramin                                                         | 1.2   | -0.6  | 0.3   |
| sirtuin 2 ( <i>h</i> )                                 | Suramin                                                         | -0.2  | -0.8  | -0.5  |
| adenylyl cyclase                                       | Forskolin                                                       | 0.1   | 0.4   | 0.2   |
| guanylyl cyclase ( <i>h</i> )                          | Sodium                                                          | 0.2   | 0.4   | 0.3   |

**Table S3: Pharmacological profiling of NAT(20:0).** The ability of NAT(20:0) (10  $\mu$ M) to interact with a panel of human (*h*) receptors, ion channels, neurotransmitter transporters and enzymes was tested at our request, by contract research organization Eurofins SA (Le Bois l'Eveque, France). The table shows the target examined, the radioligands (in parenthesis) and reference compounds used, and the effect produced by NAT(20:0) in two independent tests (1st and 2nd). Results are expressed as percent of the effect produced by each reference compound. The average of those two values is also shown. We observed no relevant changes (arbitrarily set at  $\geq 50\%$  of control) for this set of targets

Abbreviations: AMPA,  $\alpha$ -amino-3-hydroxy-5-methyl-4-isoxazolepropionic acid; AR, androgen receptor; AT<sub>1</sub>, AT<sub>2</sub>, angiotensin receptor 1 and 2; A<sub>1</sub>, A<sub>2a</sub>, A<sub>3</sub>, Adenosine receptor 1, 2a and 3;  $\alpha_1$ ,  $\alpha_2$ ,  $\beta_1$ ,  $\beta_2$ , Adrenergic receptor  $\alpha_1$ ,  $\alpha_2$ ,  $\beta_1$  and  $\beta_2$ ; BLT<sub>1</sub>, Leukotriene B<sub>4</sub> receptor 1; BZD, Benzodiazepine; B<sub>1</sub>, B<sub>2</sub>, bradykinin receptor 1 and 2; CB<sub>1</sub>, CB<sub>2</sub>, cannabinoid receptor 1 and 2; CCK, Cholecystokinin; CENP-E, Centromere-associated protein E; COMT, catechol- O-methyl transferase; Cox-1, cyclooxygenase-1; CRF<sub>1</sub>, corticotropin-releasing factor; CysLT<sub>1</sub>, Cysteinyl leukotriene receptor 1; D<sub>1</sub>, D<sub>2s</sub>, D<sub>3</sub>, D<sub>4.4</sub>, dopamine receptor 1, 2s, 3 and 4.4; Eg5, mitotic kinesin; EP<sub>2</sub>, prostaglandine E<sub>2</sub> receptor 2; ER, estrogen receptor; ET<sub>A</sub>, ET<sub>B</sub>, endothelin receptor A and B; GABA,  $\gamma$ -aminobutyric acid; GR, glucocorticoid receptor; HDAC3, HDAC4, HDAC6, HDAC11, histone deacetylase 3, 4, 6 and 11; H<sub>1</sub>, H<sub>2</sub>, H<sub>3</sub>, histamine receptor 1, 2 and 3; 5-HT, serotonin receptor; IP, prostacyclin receptor; I<sub>2</sub>, imidazoline receptor 2; M, muscarinic receptor; MAO-A, MAO-B, monoamine oxidase A and B; MC<sub>4</sub>, melanocortin-4 receptor; MT<sub>1</sub>, melatonin receptor 1; N neuronal  $\alpha_4\beta_2$ ,  $\alpha_4\beta_2$  nicotinic acetylcholine receptor; NK<sub>1</sub>, NK<sub>2</sub>, NK<sub>3</sub>, neurokinin receptor 1, 2 and 3; NMDA, N-methyl-D-aspartate receptor; NOP, nociceptin receptor; PCP, 1-(1-phenylcyclohexyl)piperidine; PDE1B, PDE2A1, PDE3A, PDE4D2, PDE5, phosphodiesterase 1B, 2A1, 3A, 4D2 and 5; PKC $\alpha$ , protein kinase C  $\alpha$ ; PPAR $\gamma$ , peroxisome proliferator-activated receptor gamma; PR, progesterone receptor; P2X, purinoceptor subtype 2 subtype X; P2Y, purinoceptor subtype 2 subtype Y; TRH1, thyrotropin-releasing hormone receptor; V<sub>1a</sub>, V<sub>2</sub>, vasopressin receptor 1a and 2; Y, neuropeptide Y receptor.
